# Supplementary material
Source: PubMed Central journal article supplement (PMC6964744)
Supplement: JB.00597-19-s0001.pdf [file JB.00597-19-s0001.pdf]

## ***Supplementary Material***

### **1 Supplementary Experimental Procedures**

#### **Construction of plasmids and strains.**

Phusion DNA polymerase and restriction enzymes (Thermo Scientific) were used in plasmid constructions (primers are listed in Table S2). Plasmids were verified by sequencing.

To construct the *dnaA* allele that will encode either pseudo-phosphorylated or phospho-ablative protein, site-directed mutagenesis was conducted by using corresponding primers (Table S2) and pET28a-DnaA<sub>His6</sub> as a template. Mutagenized sequence were obtained by PCR amplification and ligation into StuI and XhoI cut pET28-DnaA<sub>His6</sub> plasmid.

For construction of *attφC31* attachment site integrative vector, harbouring different *dnaA* allele, pSET152 plasmid was digested with EcoRV and XbaI enzymes. The ca. 500 bp fragment of chromosomal DNA, localized upstream of the *dnaA* gene and partially within the ORF (reaching the first natural BamHI restriction site within *dnaA* gene), was amplified with primers flanked with XbaI and BamHI restriction site. The remaining *dnaA* coding sequence was obtained by digestion of pET28a-DnaA<sub>His6</sub> WT/T486D vector with XhoI enzyme and filling in the 5' ends, followed by partial digestion with BamHI, resulting in 1900 bp fragment. Obtained DNA fragments were ligated, resulting in pSET-*dnaA*<sub>His6</sub> WT/T486D/T486A integrative vector. An attempt to delete the native *dnaA* gene was made by generating apramycin-resistance cassette, derived from pIJ773, with primers *dnaA*\_del\_FW and *dnaA*\_del\_RV (Table S2). The *dnaA* gene on cosmid StH18 (John Innes Centre, Norwich) was replaced with obtained cassette. The modified cosmid was used for PCR targeting protocol as described elsewhere<sup>1</sup>.

For construction of AK120  $\Delta$ *afsK* mutant, apramycin-resistance cassette, derived from pIJ773, was generated with primers *afsK*\_del\_FW and *afsK*\_del\_RV (Table S2). The *afsK* gene present on cosmid St6F11 (John Innes Centre, Norwich) was replaced with obtained cassette and PCR targeting protocol was used as described elsewhere<sup>1</sup> on AK120 strain.



## 2.2 Supplementary Tables

**Table S1. Bacterial strains and plasmids.**

| <i>S. coelicolor</i>                  |                                                                                          |                                                    |
|---------------------------------------|------------------------------------------------------------------------------------------|----------------------------------------------------|
| Strain                                | Genotype                                                                                 | Source                                             |
| M600                                  | Prototrophic, SCP1 <sup>-</sup> , SCP2 <sup>-</sup>                                      | laboratory stock                                   |
| M145                                  | Prototrophic, SCP1 <sup>-</sup> , SCP2 <sup>-</sup>                                      |                                                    |
| M1101                                 | M600 $\Delta$ <i>afsK::aac(3)-IV</i>                                                     | Hempel <i>et. al</i> , 2012;<br>Prof. Mark Buttner |
| M1102                                 | M600 $\Delta$ <i>ramC::aac(3)-IV</i>                                                     |                                                    |
| M1103                                 | M600 $\Delta$ <i>1468::aac(3)-IV</i>                                                     |                                                    |
| M1104                                 | M600 $\Delta$ <i>2244::aac(3)-IV</i>                                                     |                                                    |
| M1105                                 | M600 $\Delta$ <i>3102::aac(3)-IV</i>                                                     |                                                    |
| M1106                                 | M600 $\Delta$ <i>3820-3821::aac(3)-IV</i>                                                |                                                    |
| M1107                                 | M600 $\Delta$ <i>4487-4488::aac(3)-IV</i>                                                |                                                    |
| M1108                                 | M600 $\Delta$ <i>4507::aac(3)-IV</i>                                                     |                                                    |
| AK120                                 | M145 <i>dnaN-EGFP</i> (in frame)                                                         |                                                    |
| AK120 $\Delta$ <i>afsK::aac(3)-IV</i> | M145 <i>dnaN-EGFP</i> (in frame); $\Delta$ <i>afsK::aac(3)-IV</i>                        | this work                                          |
| AK120 <i>tipA</i> $\emptyset$         | M145 <i>dnaN-EGFP</i> (in frame); <i>attB<sub>φC31</sub>::tipA</i> $\emptyset$           |                                                    |
| AK120 <i>tipA afsK</i>                | M145 <i>dnaN-EGFP</i> (in frame); <i>attB<sub>φC31</sub>::tipA afsK</i>                  |                                                    |
| M1101 pKF256                          | M600 $\Delta$ <i>afsK::aac(3)-IV</i> ; <i>attB<sub>φBT1</sub>::afsK</i>                  |                                                    |
| del-DnaA                              | M145 <i>attB<sub>φC31</sub>::dnaA<sub>His6</sub></i> WT; $\Delta$ <i>dnaA</i> (in frame) |                                                    |
| DnaA <sub>His6</sub> WT               | M145 <i>attB<sub>φC31</sub>::dnaA<sub>His6</sub></i> WT                                  |                                                    |
| DnaA <sub>His6</sub> T486D            | M145 <i>attB<sub>φC31</sub>::dnaA<sub>His6</sub></i> T486D                               |                                                    |

**Table S1 continued.**

*E. coli*

| Strain       | Genotype                                                                                                                                                                                                                                                             | Source           |
|--------------|----------------------------------------------------------------------------------------------------------------------------------------------------------------------------------------------------------------------------------------------------------------------|------------------|
| DH5 $\alpha$ | <i>F<sup>-</sup> endA1 glnV44 thi-1 recA1 relA1 gyrA96 deoR nupG purB20 <math>\phi</math>80dlacZ<math>\Delta</math>M15 <math>\Delta</math>(lacZYA-argF)U169, hsdR17(<i>r<sub>K</sub><sup>-</sup>m<sub>K</sub><sup>+</sup></i>), <math>\lambda</math><sup>-</sup></i> | laboratory stock |
| ET pUZ8002   | <i>am-13::Tn9 dcm-6 hsdM, pUZ8002, Kan<sup>r</sup></i>                                                                                                                                                                                                               |                  |
| BL21(DE3)    | <i>B F<sup>-</sup> ompT gal dcm lon hsdS<sub>B</sub>(<i>r<sub>B</sub><sup>-</sup>m<sub>B</sub><sup>-</sup>) <math>\lambda</math>(DE3 [lacI lacUV5-T7p07 ind1 sam7 nin5]) [malB<sup>+</sup>]<sub>K-12</sub>(<math>\lambda</math><sup>S</sup>)</i></i>                 |                  |
| BL21         | <i>B F<sup>-</sup> ompT gal dcm lon hsdS<sub>B</sub>(<i>r<sub>B</sub><sup>-</sup>m<sub>B</sub><sup>-</sup>) [malB<sup>+</sup>]<sub>K-12</sub>(<math>\lambda</math><sup>S</sup>)</i></i>                                                                              |                  |

Plasmids

| Plasmid                               | General description                                                                                                                      | Source                      |
|---------------------------------------|------------------------------------------------------------------------------------------------------------------------------------------|-----------------------------|
| pET28a-DnaA <sub>His6</sub>           | pET28a induced expression vector carrying <i>dnaA<sub>His6</sub></i> gene                                                                | laboratory stock            |
| pIJ6902                               | vector integrating into <i>S. coelicolor</i> chromosomal $\phi$ C31 attachment site; carries thiostrepton-inducible <i>tipA</i> promoter | laboratory stock            |
| pKF 592                               | pIJ6902 derivative, carries thiostrepton inducible <i>afsK</i> gene                                                                      | Hempel <i>et. al</i> , 2012 |
| pSET152                               | vector integrating into <i>S. coelicolor</i> chromosomal $\phi$ C31 attachment site                                                      | laboratory stock            |
| pSET152-DnaA <sub>His6</sub> WT/T486D | vector integrating into <i>S. coelicolor</i> chromosomal $\phi$ C31 attachment site; carries <i>dnaA</i> allele                          | this work                   |
| pIJ773                                | source of the <i>aac(3)IV</i> (apramycin) resistance cassette                                                                            | laboratory stock            |

**Table S2. Oligonucleotide primers used in this study.**

| Primer         | Sequence 5' - 3'                                                                  | General description                                                                                                                                                                                                   |
|----------------|-----------------------------------------------------------------------------------|-----------------------------------------------------------------------------------------------------------------------------------------------------------------------------------------------------------------------|
| StuI_dnaA_FW   | TCGCCGAGGCACCCG<br>CCA                                                            | Primers used in site-directed mutagenesis of <i>dnaA<sub>His6</sub></i> encoding pET28a plasmid.                                                                                                                      |
| XhoI_dnaA_RV   | GTGGTGCTCGAGTGC<br>GGC                                                            |                                                                                                                                                                                                                       |
| dnaA_T486D_UP  | GCCGCCGGAGCTGGA<br>GGACCGCATCGCGAT<br>CCTGC                                       |                                                                                                                                                                                                                       |
| dnaA_T486D_DN  | GCAGGATCGCGATGC<br>GGTCCTCCAGTCCG<br>GCGGC                                        |                                                                                                                                                                                                                       |
| dnaA_del_FW    | TTGGAGCAACTTCTC<br>GGAGAGGGCCGCGG<br>GCAGGGCGTCCATAT<br>GATTCCGGGGATCCG<br>TCGACC | Primers used for generation of <i>dnaA::aac(3)-IV</i> disruption cassette.                                                                                                                                            |
| dnaA_del_RV    | GGGTCCCGGAGGCGC<br>CTTCGTGACCGGTGG<br>GGTCGGTCGCATATG<br>TGTAGGCTGGAGCTG<br>CTTC  |                                                                                                                                                                                                                       |
| dnaA_pprom_FW  | GGATCCAGTGCTCGT<br>CCTTCGAC                                                       | Primers used for amplification of ~500 bp fragment of chromosomal DNA, localized upstream of the <i>dnaA</i> gene and partially within the ORF (see Construction of plasmid and strains in Supplementary procedures). |
| dnaA_pprom_RV  | TCTAGAGATGTCATG<br>ACCCGACCGGGAT                                                  |                                                                                                                                                                                                                       |
| afsK_del_FW    | GTGGTGGATCAGCTG<br>ACGCAGCACGATCCG<br>CGGCGGATCATTCCG<br>GGGATCCGTCGACC           | Primers used for generation of <i>afsK::aac(3)-IV</i> disruption cassette.                                                                                                                                            |
| afsK_del_RV    | TCACGTCGTACGGGC<br>GGTCCCCGTGCCCTT<br>CTCCGCGTCTGTAGG<br>CTGGAGCTGCTTC            |                                                                                                                                                                                                                       |
| afsK_FW        | GGATCCGTGGTGGAT<br>CAGCTGACGCA                                                    | Primers used for amplification of <i>afsK</i> gene                                                                                                                                                                    |
| afsK_RV        | TCACGTCGTACGGGC<br>GGT                                                            |                                                                                                                                                                                                                       |
| oriC_Bf2_IR700 | CCTCGCACGTCCCCG<br>CGTCTC                                                         | Primers used for generation of near-infrared labelled <i>oriC</i> fragment.                                                                                                                                           |
| oriC_Br7_IR700 | GGCATGTGGAGAAGC<br>TGGTGATC                                                       |                                                                                                                                                                                                                       |

## References

1. Gust B, Challis GL, Fowler K, Kieser T, Chater KF (2003) PCR-targeted *Streptomyces* gene replacement identifies a protein domain needed for biosynthesis of the sesquiterpene soil odor geosmin. *Proc Natl Acad Sci USA* *100*, 1541–1546.
2. Sievers F, Wilm A, Dineen DG, Gibson TJ, Karplus K, Li W, Lopez R, McWilliam H, Remmert M, Söding J, Thompson JD, Higgins DG (2011). Fast, scalable generation of high-quality protein multiple sequence alignments using Clustal Omega. *Molecular Systems Biology* *7*:539 doi:10.1038/msb.2011.75
